# Supplementary material for: The human milk oligosaccharide 2′-fucosyllactose modulates CD14 expression in human enterocytes, thereby attenuating LPS-induced inflammation
Source: HighWire-hosted journal article supplement (doi:10.1136/gutjnl-2014-307544), 2014-11-27
Supplement: gutjnl-2014-307544supp_table.pdf [file gutjnl-2014-307544supp_table.pdf]

**Supplemental table 1.** Primers used in qRT-PCR .

| <b>Gene</b>    | <b>Primers</b> | <b>Primer Sequence</b> | <b>Amplicon (bp)</b> |
|----------------|----------------|------------------------|----------------------|
| CD14           | FW             | ACGCCAGAACCTTGTGAGC    | 122                  |
|                | REV            | GCATGGATCTCCACCTCTACTG |                      |
| TLR4           | FW             | GTACCTGGGGAACAACCTCTT  | 146                  |
|                | REV            | GCAGCTTGACTAGACTCTCCA  |                      |
| MyD88          | FW             | ATCGCTGTTCTTGAACCCTCG  | 199                  |
|                | REV            | CTCACGGTCTAACAAGGCCAG  |                      |
| NF- $\kappa$ B | FW             | AATTAACGGCGACAATCTGGAA | 205                  |
|                | REV            | ACTTCACAAGCATAGCCATCAG |                      |
| IL-8           | FW             | TTTTGCCAAGGAGTGCTAAAGA | 194                  |
|                | REV            | AACCCTCTGCACCCAGTTTTC  |                      |
| GADPH          | FW             | TGTTGCCATCAATGACCCCTT  | 202                  |
|                | REV            | CTCCACGACGTACTIONCAGCG |                      |
| Actin          | FW             | CATGTACGTTGCTATCCAGGC  | 250                  |
|                | REV            | CTCCTTAATGTCACGCACGAT  |                      |
